# Supplementary material for: Utilizing loop-mediated isothermal amplification (LAMP) for detecting hemoglobin Constant Spring and hemoglobin Pakse mutations amidst the high prevalence and genetic heterogeneity of thalassemia in Thailand
Source: PeerJ. 2025 Jul 7;13:e19687. doi: 10.7717/peerj.19687 (PMC12244126; doi:10.7717/peerj.19687)
Supplement: Supplemental Information 1 [file peerj-13-19687-s001.xlsx]

## Sheet: Data
MD	Hb	Hct	MCV	MCH	Typing	A2/E	F	Cs	H	Bart's	SEA	3.7	4.2	CS	PS	LAMP CS	LAMP PS
1	14.2	49.9	80.5	26.6	A2A	2										N	N
2	13.2	37.7	75.2	26.3	A2A	2.5										N	N
3	16.7	49.4	76.7	25.9	A2A	2.6						1				N	N
4	12	36.2	81	26.8	EA	27.8	4.9									N	N
5	13.3	40.7	82	27.1	EA	26.4						1				N	N
6	15.7	47.4	80.1	26.5	A2A	4	0.6									N	N
7	13.6	40.7	77.7	26	A2A	2.9										N	N
8	11.9	35.5	71.4	23.9	EA	28										N	N
9	13	40.7	76.4	24.4	EA	28.1										N	N
10	15.8	48.4	76.5	25	EA	24.6									1	N	P
11	13.5	38.8	81.2	28.2	A2A	2.8										N	N
12	9.7	29.6	76.3	25	A2A	2.7										N	N
13	12.5	36.3	78.4	27	A2A	2.5						1				N	N
14	14.1	40.3	68.3	23.9	EA	29.1										N	N
15	12.1	37.4	81.3	26.3	A2A	2.8	1.4									N	N
16	12.7	38.5	76.5	25.2	EA	28.3										N	N
17	8.3	25.1	75.8	25.1	EA	29.5										N	N
18	10.6	32.3	70.1	23	EA	28.1										N	N
19	4.2	19.1	64.1	14.1	A2A	2.4						1				N	N
20	15.2	46.7	81.4	26.5	A2A	2.8										N	N
21	15.1	43.9	72.4	24.9	A2A	4.7										N	N
22	13.9	42.5	78.4	25.6	EA	27.4						1				N	N
23	12	36.2	74.2	24.6	EA	25						1				N	N
24	12.4	36	81.3	28	A2A	2.8										N	N
25	7.7	26.2	61.5	18.1	EA	24.9										N	N
26	7.7	25.8	73.7	22	A2A	2.2										N	N
27	11.5	33.6	75.5	25.8	EA	26.3						1				N	N
28	15.9	48.6	74.7	26.1	A2A	2.6										N	N
29	11.5	35.5	81.5	26.6	A2A	2.1								1		P	N
30	13.9	43.1	74.6	24	A2A	2.5						1				N	N
31	11.4	34.5	77.9	25.7	EA	26.2									1	N	P
32	13.9	42.1	75.9	25	EA	27.1										N	N
33	11.9	36.8	79.7	25.8	A2A	2.6										N	N
34	14.6	45.2	80.4	26.1	A2A	2.7						1				N	N
35	11.3	35.1	77.5	24.9	A2A	2.6						1				N	N
36	12.5	37.5	74.6	24.9	EA	29										N	N
37	14	41.4	79.8	27	EA	26.7						1				N	N
38	8.7	29.2	66.8	19.9	EA	26.8										N	N
39	12.4	36.6	75.8	25.7	EA	27.4						1				N	N
40	11.9	25.8	74.4	24.7	EA	27.3										N	N
41	8.5	27.8	79.2	24.2	A2A	1.8										N	N
42	14.5	45.5	78.6	25	A2A	2.6						1				N	N
43	14	47.6	86	28.9	EA	26								1		P	N
44	14	43.6	81.2	26.1	A2A	2.8						1				N	N
45	9.6	30.2	61.3	19.5	A2A	5.6										N	N
46	10.4	33	64.8	20.4	A2A	5.6						1				N	N
47	13.9	43.8	78.2	24.8	EA	29.7										N	N
48	10.6	32.8	81.6	26.4	A2A	2.8						1				N	N
49	13.8	41.4	81.9	27.5	A2A	2.8							1			N	N
50	13.9	42.3	81.5	26.8	A2A	2.5						1				N	N
51	15.5	47.5	67	21.9	A2A	2.3					1					N	N
52	11.7	33.6	81.8	28.5	A2A	2.6										N	N
53	15.6	45.5	81	27.8	A2A	2.9										N	N
54	10.7	33.9	68.9	21.7	A2A	5.2	0.6					1				N	N
55	14.5	44.2	71.8	23.5	EA	27.3										N	N
56	12.4	37.8	71.9	23.6	EA	21.3	1.3					2				N	N
57	9.7	28.5	66.9	22.8	EE	98.1	1.9					1		1		P	N
58	14.9	45.6	77.9	25.5	Cs A2A	2.2		0.7						1		P	N
59	11	33.5	77.5	25.5	A2A	2.5						1				N	N
60	13.8	41.7	76.9	25.5	A2A	2.2	0.4						1			N	N
61	10.1	31.4	81.3	26.2	A2A	2.4						1				N	N
62	11.5	35.5	66.2	21.5	EA	27.5										N	N
63	13.1	39	81.6	27.4	A2A	2.5										N	N
64	13.4	39.9	91.1	30.6	EA	29.5										N	N
65	12.2	39	78.3	24.5	Cs A2A	2.3	0.7							1		P	N
66	9.5	19.4	48	15.5	EE	100					1					N	N
67	9.5	29.6	81.1	26	A2A	2.7						1				N	N
68	13.4	40.1	74.4	24.9	EA	28.9										N	N
69	12.2	37.4	71.1	23.2	EA	29.1										N	N
70	14.5	44.1	74.6	24.5	EA	27.5										N	N
71	12	37.4	63.6	20.4	EA	18.8						2				N	N
72	14	45	77.6	24.5	EA	24.8						1				N	N
73	12.1	36.2	59.7	20	EE	96.5	9.5									N	N
74	9.2	30.1	62.2	19	EA	26.5										N	N
75	8.5	28.2	59.5	18	A2A H	1			8.7		1	1				N	N
76	5.6	17.9	69.6	21.8	A2A	2.6	1.5				1					N	N
77	9.4	28.2	76.6	25.5	EA	29.2	1.7									N	N
78	11.7	35.4	68.3	22.6	EA	22.6						1				N	N
79	9.6	31.5	51.7	15.8	A2A	1.7					1	1				N	N
80	8.8	30.5	56.5	16.3	EA	26										N	N
81	11.1	34	75.2	24.6	EA	29.5										N	N
82	14.3	44.6	79.5	25.5	EA	29.1										N	N
83	9	28.9	75.1	23.4	A2A	2.4						1				N	N
84	14.8	46	76.3	24.5	A2A	2.4						1				N	N
85	11	32.9	76.9	25.7	EA	28	2.3									N	N
86	8	29.1	51.6	14.2	EA	32.9										N	N
87	12.7	37.5	76.1	25.8	A2A	3										N	N
88	9.4	28.8	61.8	20.2	EE	98.9	1.1							1		P	N
89	11.1	36.7	72.8	22	A2A	2.2										N	N
90	11.8	35.6	79.5	26.3	A2A	2.6										N	N
91	14.2	43.2	80.1	26.3	A2A	2.8						1				N	N
92	11.3	33.6	72.9	24.5	EA	30										N	N
93	13.9	43.3	80	25.7	A2A	2.7						1				N	N
94	8.2	25.1	53.2	17.4	EE	100						2				N	N
95	10.7	35.4	67.6	20.4	Cs A2A	2		1.1				1		1		P	N
96	14.8	44.7	78.1	25.9	A2A	2.3						1				N	N
97	13.8	43	80.1	25.7	EA	26.6						1				N	N
98	12	37.1	76.5	24.7	A2A	5.3	0.5							1		P	N
99	7.9	27	53.1	15.6	EA	21.7						1				N	N
100	11.5	36.2	85.8	27.3	A2A	2.7										N	N
101	8.8	30.3	59.1	17.2	A2A	0.9					1	1				N	N
102	10.1	29.3	61.3	21.1	EE	98.2	1.8					1				N	N
103	13.7	42.9	83.3	26.6	A2A	2.4						1				N	N
104	11.7	35.2	79.8	26.5	A2A	3						1				N	N
105	13.6	42.9	78.3	24.8	A2A	2.5						1				N	N
106	12.3	38.3	69.8	22.4	A2A	2.4	1.5					2				N	N
107	15.5	47.1	77.1	25.4	EA	28										N	N
108	14.9	44.3	81.3	27.3	A2A	2.2						1				N	N
109	10.5	33.2	51.6	16.3	EA	48.4	4.1									N	N
110	14.4	43.7	78	25.7	EA	28.6										N	N
111	8.8	26.8	79.1	26	A2A	2.3										N	N
112	13.2	41	74.5	24	EA	27.6										N	N
113	12.7	38.6	79.9	26.3	EA	30.5										N	N
114	9.3	30.1	74.5	23	Cs A2A	1.4	2.8	4.4						2		P	N
115	14.1	43.4	76.3	24.8	EA	25.8									1	N	P
116	10.4	30.6	62.1	21.1	EE	96.1	3.9									N	N
117	12.1	36.4	78.6	26.1	EA	26.2						1				N	N
118	10.2	31.7	71.7	23.1	EA	19.6						2				N	N
119	13.9	42.1	77.8	25.7	EA	29.1										N	N
120	7.6	22	74.6	25.8	EA	28.6	0.2									N	N
121	10.9	33.3	71.2	23.3	A2A	2.6						1				N	N
122	11.4	34.1	56.7	19	EE	98.3	1.7									N	N
123	12.7	38.3	72.1	23.9	EA	28.8	0.2									N	N
124	7.4	22.7	70.9	23.1	EA	28.1	0.4									N	N
125	14.1	40.9	76.9	26.5	EA	27.3						1				N	N
126	13.2	41.2	78.6	25.2	A2A	2.7						1				N	N
127	12.8	39.4	67.1	21.8	A2A	2.7						2				N	N
128	12	34.7	76.1	26.9	EA	27	6.4									N	N
129	11.8	36.6	79.2	25.5	A2A	2.7						1				N	N
130	13.6	41.8	76.6	24.9	EA	25.4								1		P	N
131	9.3	30.9	68.7	20.7	A2A	1.9						1				N	N
132	10.5	32.7	65.4	21	EA	27.3										N	N
133	14.3	42.7	78.8	26.4	A2A	2.6						1				N	N
134	10.8	34.9	74.3	23	A2A	2.3	0.4					1				N	N
135	12.9	41.5	68.3	21.2	EA	20.6						2				N	N
136	12.9	39.1	81.1	26.8	A2A	2.7						1				N	N
137	15.9	48.1	78	25.8	EA	26.9										N	N
138	10.7	32.7	72.8	25.8	EA	28.5	1.5									N	N
139	13.2	40.8	76.5	24.8	EA	28.7										N	N
140	12.1	37.3	79.5	25.8	EA	28.9										N	N
141	13.6	43	73.4	23.2	EA	28.8										N	N
142	10.5	32.8	54.4	17.4	EE/EF	93.2	6.8									N	N
143	10.7	34.3	68.2	21.3	A2A	2.1					1					N	N
144	14.1	43.6	77	24.9	EA	28.9										N	N
145	13.4	42.3	81.3	25.8	A2A	2.5						1				N	N
146	12.8	37.6	81.6	27.8	A2A	2.7										N	N
147	11.9	35.5	74.6	25.2	A2A	2.5										N	N
148	8.3	25.5	59.6	19.4	A2A	2.2						2				N	N
149	12.9	39.4	78.8	25.8	EA	28.4										N	N
150	12.5	39.5	77.3	24.5	EA	28.6										N	N
151	12.8	39.3	76	24.8	A2A	2.5						1				N	N
152	7.3	22.6	71.7	23.2	EA	28.2	0.2									N	N
153	9.9	32.8	54.7	17	A2A	5.3	2.4									N	N
154	9.3	28.2	68.1	22.5	EA	28.2										N	N
155	9.8	29.4	83.8	27.9	EA	25.1						1				N	N
156	12	36	79.5	26.5	EA	28.1										N	N
157	13.3	42.1	70.4	22.1	Cs A2A	1.9		0.8				1		1		P	N
158	9.7	30.6	66.8	21.2	A2A	2.3	0.7				1					N	N
159	15.5	45.6	86.7	29.5	A2A	2.9										N	N
160	14.3	43.6	79.1	26	EA	27.6										N	N
161	11.6	35.2	77.5	25.6	EA	27	0.6					1				N	N
162	14.7	43	76.4	26.1	A2A	2.5						1				N	N
163	11.2	33.3	78.4	26.4	EA	25.5						1				N	N
164	13.4	42.6	62.6	19.7	EA	20.4					1					N	N
165	9	26.8	56.7	19	A2A Bart's H	1.4	1.2		2.4		1	1				N	N
166	14.2	46	72.4	22.4	Cs A2A	1.6		0.7				1		1		P	N
167	12.7	39	79.1	25.8	A2A	2.2									1	N	P
168	10.1	30.4	74.3	24.7	EA	26.7	0.4									N	N
169	5.8	20	60.8	17.6	A2A	1.8									1	N	P
170	12.9	38.8	75.2	25	EA	28.1										N	N
171	15.4	46.2	77.5	25.8	EA	29.4										N	N
172	12.3	36.9	65	21.7	A2A	2.4					1					N	N
173	13.4	40.4	80.5	26.7	A2A	1.5										N	N
174	11	33.1	78.4	26.1	A2A	2.9	1.2									N	N
175	8.5	26.7	63.4	20.2	A2A	5	3									N	N
176	11.4	33.6	76.7	26	EA	27.1	0.1					1				N	N
177	12.1	38.1	81.4	25.9	A2A	3.1	1.6									N	N
178	13.7	42.7	76.9	24.7	EA	28.3										N	N
179	12.2	38.1	81.6	26.1	A2A	2.4						1				N	N
180	11.5	32.7	78	27.4	A2A	2.9										N	N
181	14.5	44.2	82	26.9	A2A	2.7										N	N
182	16.3	50.7	82.3	26.5	A2A	2.5						1				N	N
183	9.1	28.9	59.2	18.6	EA	26.3										N	N
184	12.7	39.5	69.1	22.2	EA	20.1					1					N	N
185	11.4	35.4	63.8	20.5	EA	20.2					1					N	N
186	12.1	36.4	80.5	26.8	A2A	2.8						1				N	N
187	11.5	39.8	69.6	23	EA	29										N	N
188	14.3	43.6	84.5	27.7	A2A	3.1										N	N
189	12.3	35.8	73.8	25.4	EA	27						1				N	N
190	14.6	45.7	78.3	25	Cs EA	26.3		0.3						1		P	N
191	9	28.9	62.6	19.5	EA	25.7										N	N
192	6.2	22.5	56.8	15.7	EA	24.1										N	N
193	15.5	48	75.9	24.5	A2A	2.4						1				N	N
194	3.1	29.8	54.6	16.7	EA	17.8					1					N	N
195	11.2	35.5	78.5	24.8	A2A	2.2						1				N	N
196	12	36.6	71.6	23.5	EA	29.8										N	N
197	15.7	49.1	75.1	24	Cs A2A	2.1		0.4						1		P	N
198	13.8	41.5	79.3	26.4	EA	27.3						1				N	N
199	13.4	43.7	69.3	21.2	A2A	2.5						2				N	N
200	11.2	33.4	80.7	27.1	EA	27.9						1				N	N
201	12.1	36.6	74.4	24.6	EA	28.8	1.5									N	N
202	12.9	38.9	78.4	26	EA	28.1										N	N
203	15.7	47.3	79.8	26.5	EA	26.8						1				N	N
204	10.5	33.8	78.1	24.2	A2A	2.7						1				N	N
205	11.2	36.7	65.8	20.1	A2A	2.6					1					N	N
206	9.8	31.5	70.5	21.9	EA	32.5										N	N
207	15.6	45.9	82.1	27.9	EA	23.7										N	N
208	10.5	31.6	74.9	24.9	EA	29.1										N	N
209	13.6	44.4	78.7	24.1	A2A	2.4						1				N	N
210	12	34.4	77.3	27	A2A	2.9	0.9									N	N
211	8.5	24	62	22	EE	97.6	2.4									N	N
212	9.5	29.9	75.3	23.9	EA	26.5										N	N
213	9.2	29.5	62.8	19.6	A2A	2.3					1					N	N
214	6.4	21.4	69.7	21.2	A2A	2.3					1					N	N
215	11.1	33.9	72.9	23.9	EA	19.6						2				N	N
216	11.2	33	60.4	20.5	EE	99	1				1					N	N
217	14	42.9	79.3	25.9	EA	26.8										N	N
218	11.1	33	79.7	26.8	EA	27.5								1		P	N
219	9.8	31.5	73.9	23	A2A	2.5						1				N	N
220	12.4	39.2	69.3	21.9	A2A	2.7						2				N	N
221	16.5	33.2	71.2	22.5	A2A	2.2						2				N	N
222	11.1	34.5	78.1	25.1	EA	29.3										N	N
223	12.8	32.3	78.6	25.6	Cs A2A	2	0.5							1		P	N
224	13.2	40.2	80.1	26.3	A2A	2.9										N	N
225	13.3	40.4	76.5	25.2	EA	28.2										N	N
226	12.8	38.8	76.4	25.2	EA	27.7										N	N
227	14.9	45.1	77.9	25.7	A2A	2.8						1				N	N
228	16.1	44.4	80.8	29.5	A2A	2.7										N	N
229	12.7	36	79.3	28	A2A	2.6										N	N
230	14.6	46.5	79.6	25	A2A	2.8						1				N	N
231	11.2	33	67.6	26	EA	28.1										N	N
232	10.3	30.5	78.2	26.4	EA	28.8										N	N
233	13.5	44.5	66.9	20.3	A2A	2.4										N	N
234	13.2	40.2	74.4	24.4	A2A	2.9						1				N	N
235	15.7	49.2	79.7	25.4	A2A	2.5						1				N	N
236	11.5	36.1	85.3	27.2	A2A	2.7	2.5					1				N	N
237	14.9	45.4	82.7	27.1	A2A	2.7						1				N	N
238	12.6	41.5	63.7	19.3	A2A	2.4					1					N	N
239	11.6	35.1	53.3	17.6	EE	100										N	N
240	6.7	21	81.4	26	A2A	2										N	N
241	10.6	34.8	76	23.8	Cs EA	15.3		0.5						1		P	N
242	16.1	50.8	63.1	20	EA	14.3					1					N	N
243	13	38.4	76.3	25.8	EA	26.2						1				N	N
244	13.3	41.2	83.9	27.1	A2A	2.6							1			N	N
245	13.8	44	83.2	26.1	EA	28.1										N	N
246	10.3	31.8	73.1	23.7	EA	25						1				N	N
247	10.2	34.8	51.9	15.2	A2A	2.4					1					N	N
248	14.3	41.9	79.8	27.2	EA	25.1	0.8					1				N	N
249	15.4	45.9	77.7	26.1	EA	24.9						1				N	N
250	11.8	36.5	69.7	22.5	EA	19.6						2				N	N
251	8.5	27.3	70.5	22	Cs A2A	2.1		0.3						1		P	N
252	7.5	22	73.6	25.1	EA	26										N	N
253	15.3	47.3	76.8	24.8	A2A	2.5						1				N	N
254	10.9	35.5	77.2	23.9	Cs A2(E)A	1	0.7	0.5						1		P	N
255	7.3	27.2	60.4	16.2	A2A	1.7										N	N
256	9.8	30.7	76.4	24.4	EA	28.4	3.3									N	N
257	12.6	36.4	87.1	30.1	A2A	2.8										N	N
258	11.4	34.6	74.1	24.4	EA	29.2										N	N
259	9.1	31.2	66.2	19.3	A2A	2.3										N	N
260	15.3	46.2	81.5	27	EA	26	0.4					1				N	N
261	11.6	34.1	70.9	24.1	EA	27.3										N	N
262	15.4	46.2	89.4	29.8	EA	26.8						1				N	N
263	13.5	41.7	79.6	25.8	EA	28.4										N	N
264	13.9	41.2	77.9	26.3	A2A	2.7						1				N	N
265	16.3	48.1	72.3	24.5	EA	28.5										N	N
266	11.9	37.4	72.6	23.1	A2A	2.5						1	1			N	N
267	8.6	26.3	75.1	24.6	A2A	4.9	5.3									N	N
268	13.1	39.8	78.5	25.8	Cs A2A	2.4		0.6						1		P	N
269	14.2	45.2	72.6	22.8	Cs A2A	2.6	0.7	0.4						1		P	N
270	12.8	38.2	76.4	25.6	EA	27.4						1				N	N
271	11.1	34.5	69.4	22.3	A2A	6.1						1				N	N
272	11.5	35.4	75.3	24.5	A2A	2.4										N	N
273	11.9	38.3	76.6	23.8	A2A	2.6						2				N	N
274	12.8	42.3	58.2	17.6	A2A	6.1	0.5									N	N
275	13.7	42	81.4	26.6	A2A	2.9										N	N
276	11.5	35.5	78.3	25.5	A2A	2.2						1				N	N
277	13.9	44.4	68.8	21.6	A2A	5	0.9				1					N	N
278	12.1	35.9	81.8	27.6	A2A	2.6										N	N
279	9.3	35.3	78.6	20.7	Cs A2A	0.6		4	15.8	1	1			1		P	N
280	11.7	38.3	63.9	19.5	A2A	2.3					1					N	N
281	10.7	33.3	72.7	23.4	Cs A2A	2.4		0.7						1		P	N
282	10.5	34.2	79.9	24.5	Cs A2A	2.2		0.7						1		P	N
